# Supplementary material for: VPS35 depletion does not impair presynaptic structure and function
Source: PubMed Central journal article supplement (PMC5812998; doi:10.1038/s41598-018-20448-4), 2018-02-14
Supplement: 41598_2018_20448_MOESM1_ESM.pdf [file 41598_2018_20448_MOESM1_ESM.pdf]

## Supplementary files

### VPS35 depletion does not impair presynaptic structure and function

Sonia Vazquez-Sanchez<sup>1</sup>, Sander Bobeldijk<sup>1</sup>, Marien P. Dekker<sup>2</sup>, Linda van Keimpema<sup>1,3</sup>, and Jan R.T. van Weering<sup>2,\*</sup>

<sup>1</sup>*Department of Functional Genomics, Center for Neurogenomics and Cognitive Research, Neuroscience Campus Amsterdam, Vrije Universiteit (VU), Amsterdam, Netherlands*

<sup>2</sup>*Clinical Genetics, Center for Neurogenomics and Cognitive Research, Neuroscience Campus Amsterdam, VU medical center, Amsterdam, Netherlands*

<sup>3</sup>*Sylics (Synaptologics BV), PO box 71033, 1008 BA, Amsterdam, The Netherlands.*

\*Corresponding author: Jan R.T. van Weering, Center for Neurogenomics and Cognitive Research, VU University, De Boelelaan 1085, 1081 HV Amsterdam, The Netherlands. Email: [jan.van.weering@vu.nl](mailto:jan.van.weering@vu.nl)

a'

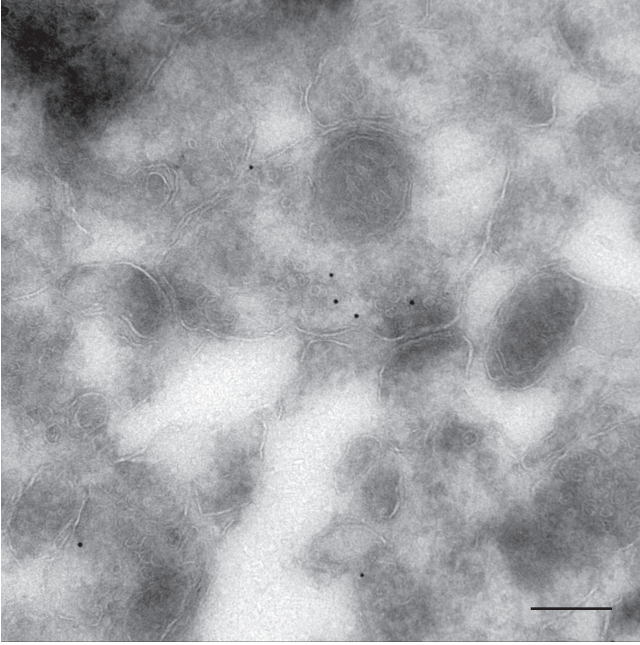

a''

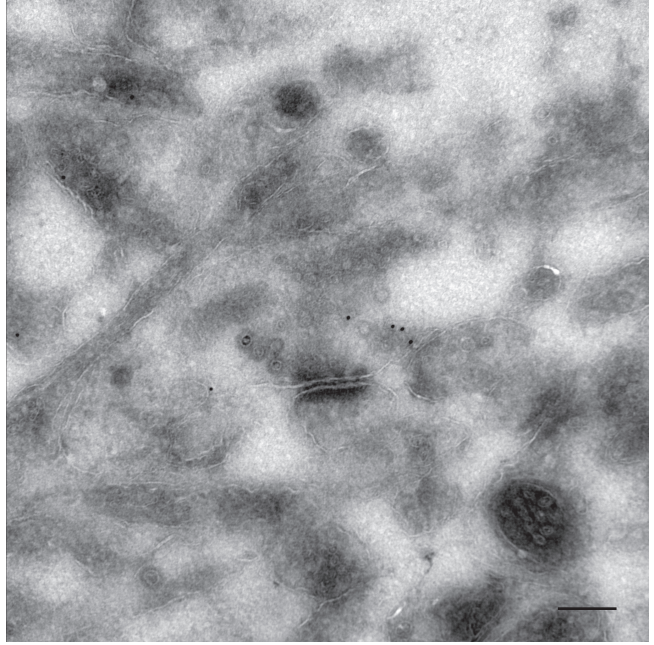

b'

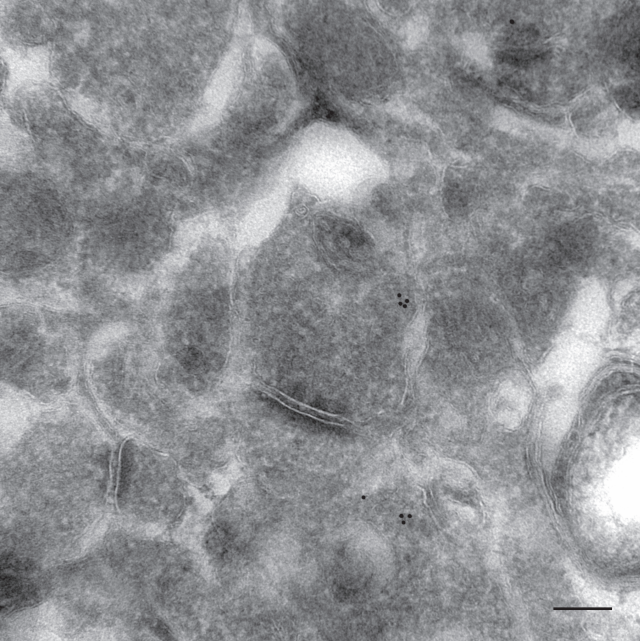

b''

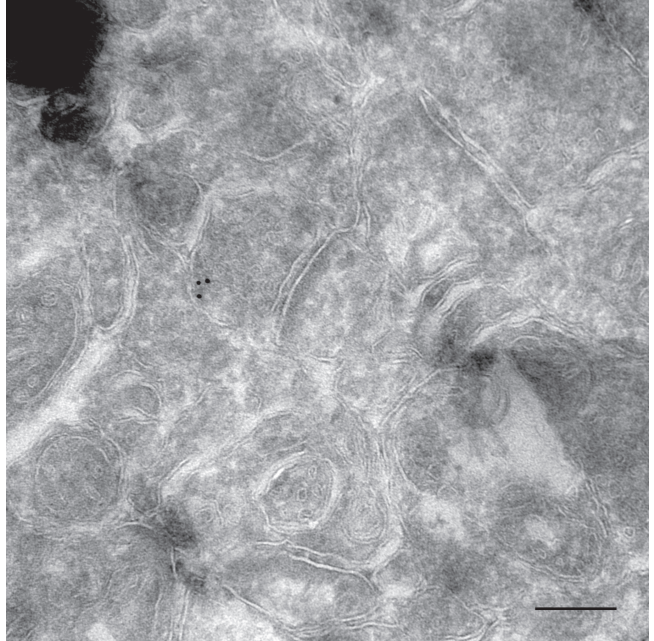

**Supplementary Figure S1: Uncropped electron micrographs of the presynaptic localization of VPS35.** (a' and a'') Corresponding images from Figure 1 e' and e'' using the rabbit antibody against VPS35. N=2 animals. (b' and b'') Corresponding images from Figure 1 f' and f'' using the goat antibody against VPS35. N=2 animals. Scale bar=200 nm.



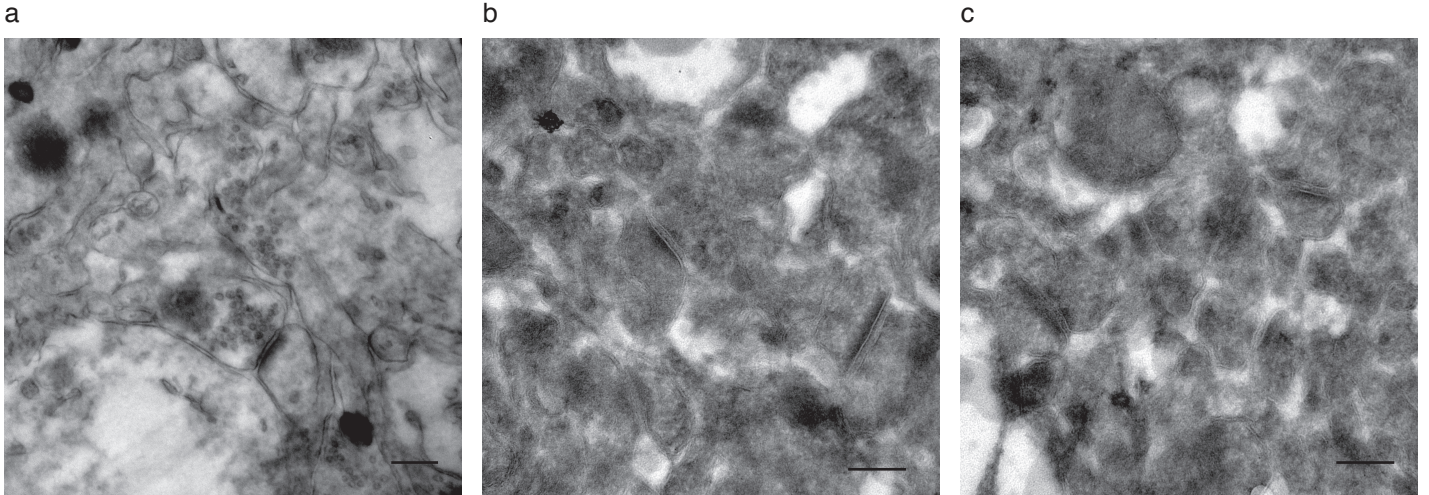

**Supplementary Figure S2: Electron micrographs of the negative controls for immunoelectron microscopy against VPS35.** (a) Negative control processed in parallel with the immunolabelling with VPS35 Cat. No. ab10099, but preincubating the primary antibody with the blocking peptide Cat. No. ab23181 at a ratio 5:1, Figure 1c-d. Scale bar=250nm. (b and c) Negative control processed in parallel with the immuno-gold labelling with VPS35, but without adding primary antibody, just bridging antibody and Protein A-gold, Figure 1e-f. Scale bar=200nm.

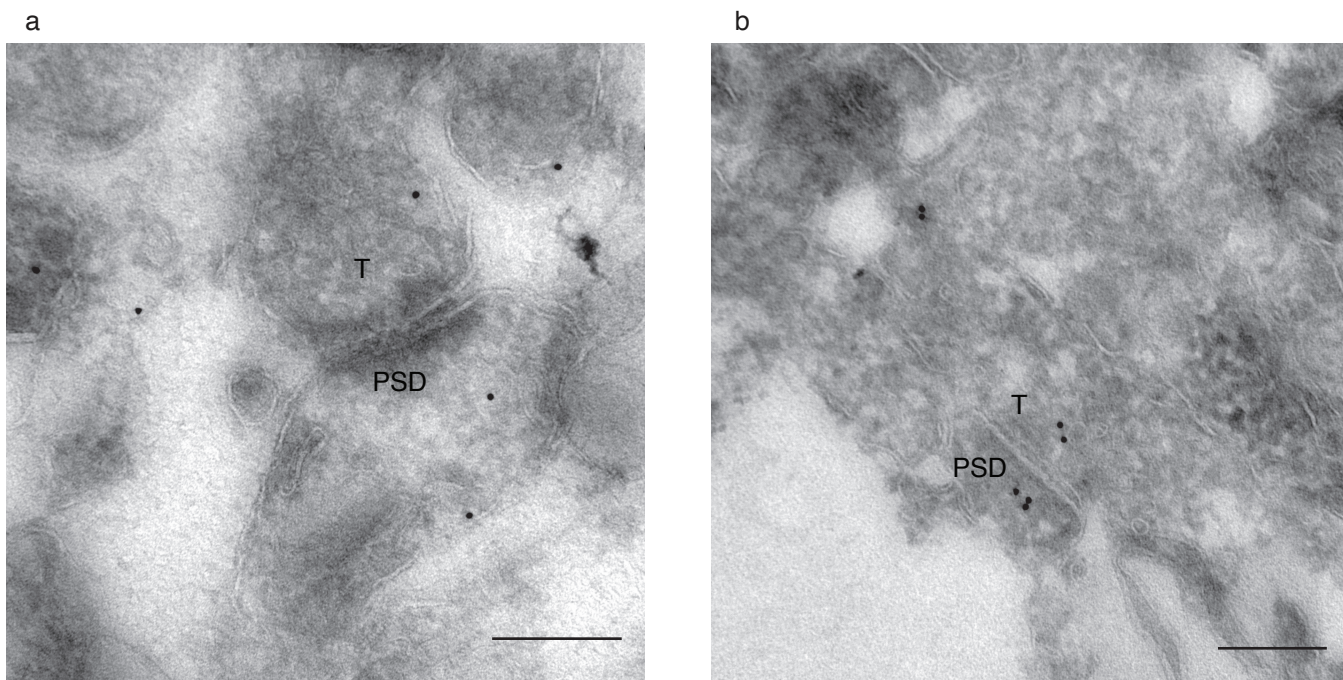

**Supplementary Figure S3: Electron micrographs of the postsynaptic localization of VPS35.** (a) Using the rabbit antibody against VPS35. N=2 animals. (b) Using the goat antibody against VPS35. N=2 animals. Scale bar=200 nm. 'PSD' indicates postsynaptic density and 'T' the presynaptic terminal.



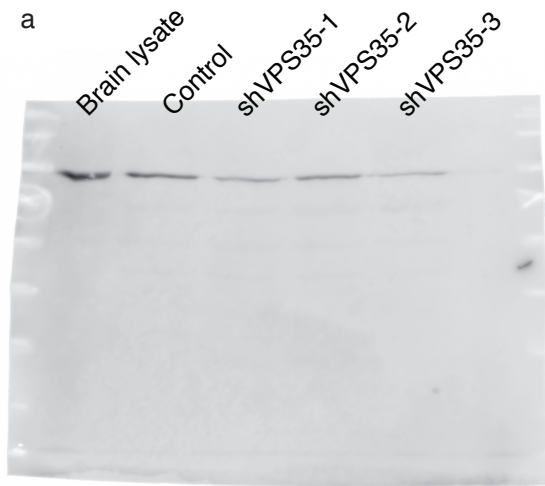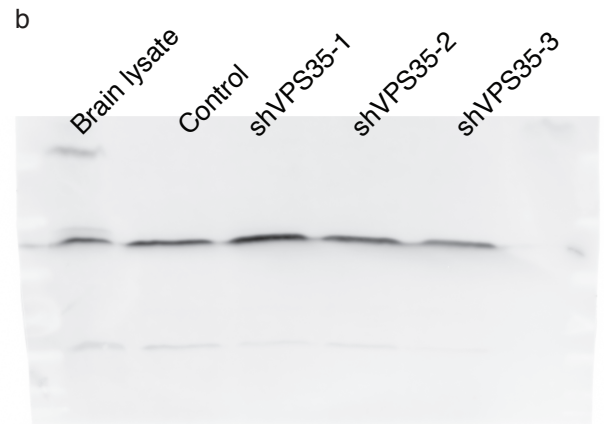

**Supplementary Figure S4: Original uncropped blots for (a) VPS35 and (b) actin of the data shown in Figure 2b. The brain lysate condition serves as a technical control and is left out in Figure 2.**

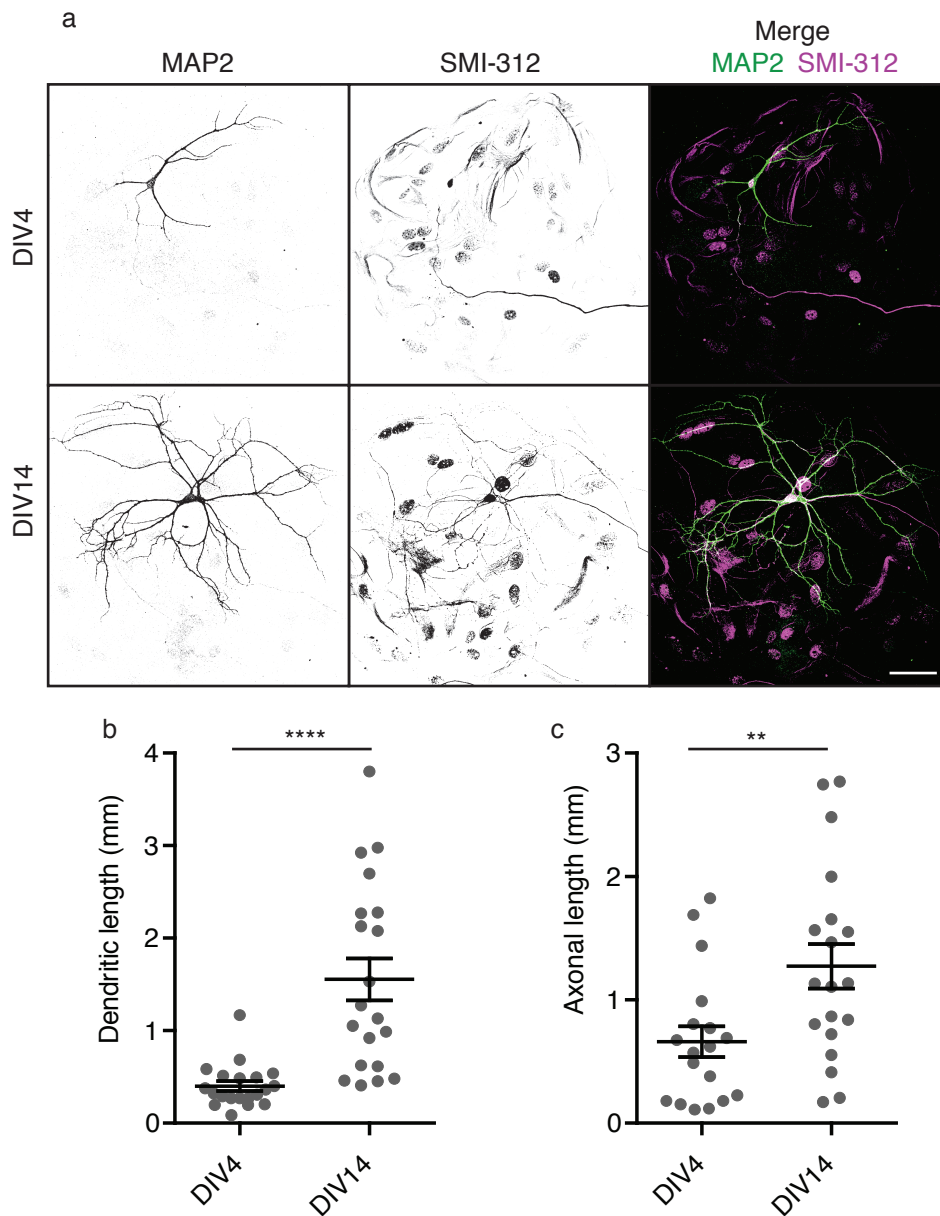

**Supplementary Figure S5. Increase in dendritic and axonal length during development is detected using SynD.** (a) Representative confocal microscopy images of hippocampal autaptic wild type neurons at DIV4 and DIV14 stained with MAP2 and SMI-312. Scale bar=50  $\mu$ m (b) Quantification of the dendritic length (n=20 neurons, N=2 animals). (c) Quantification of the axonal length (n=20 neurons, N=2 animals). Detailed information (average, SEM, n and statistics) is available in in Table S1.



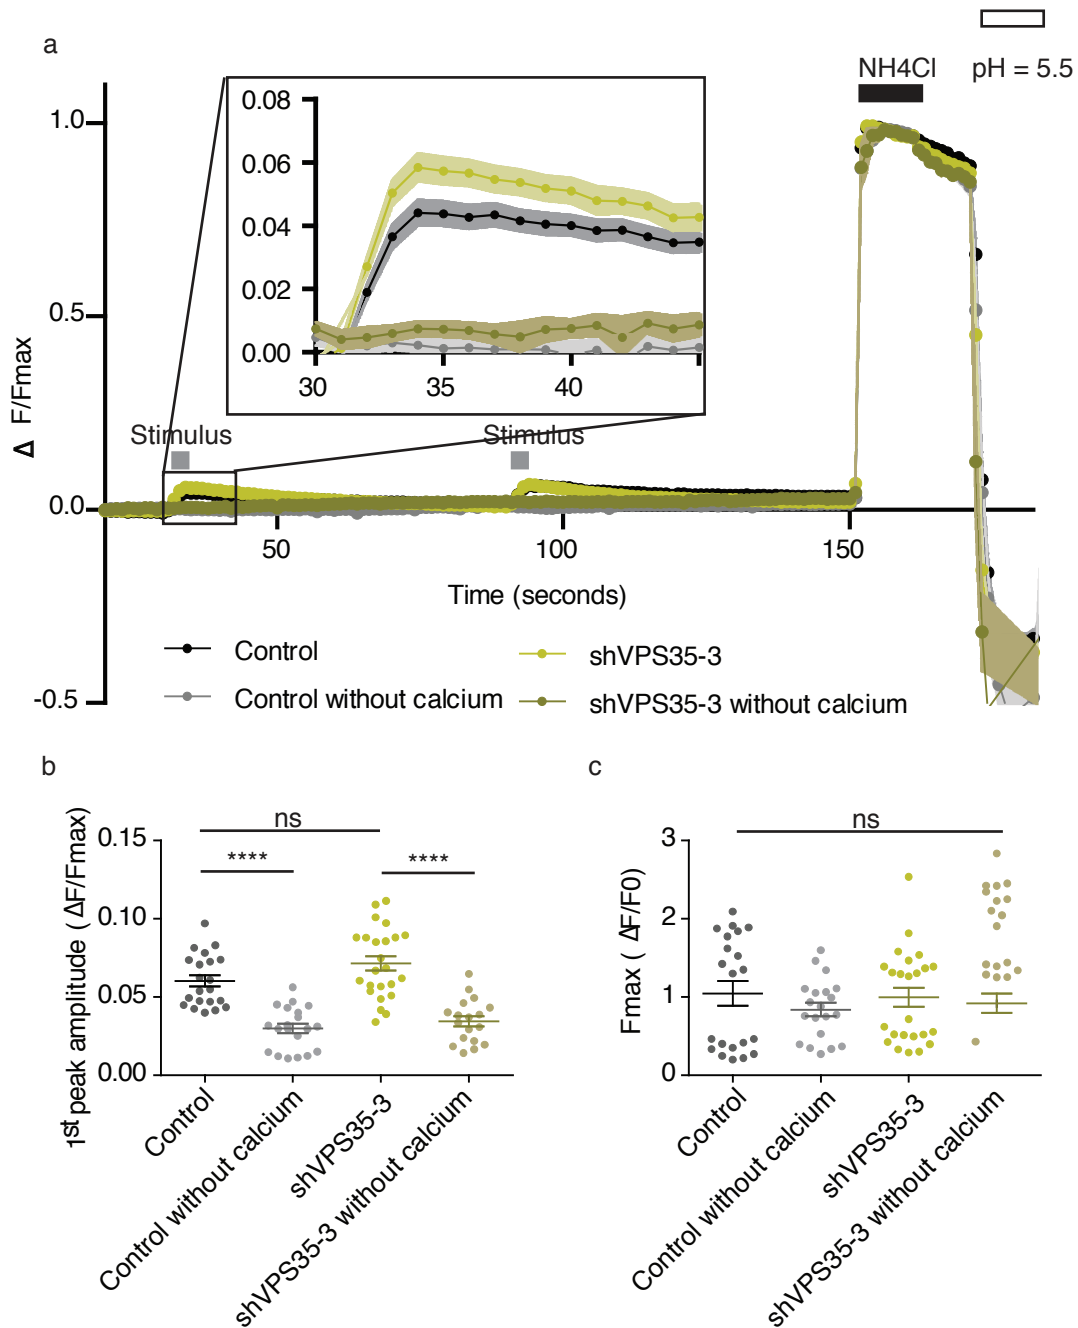

**Supplementary Figure S6: SynaptopHluorin reports the absence of calcium in the extracellular medium.** (a) Time course of synaptopHluorin fluorescence during the imaging protocol, plotted as  $\Delta F/F_{max}$ . The grey boxes indicate the electrical stimulation (100 AP, 40 Hz, 30 mV each one), the black box the duration of the exposure to  $NH_4Cl$  and the white box the duration of the exposure to  $pH=5.5$ . ( $n=21 \pm 3$  fields of view,  $N=2$  animals). (b) Maximum response amplitude during the electrical stimulation plotted as  $\Delta F/F_{max}$ . (c) Maximum synaptopHluorin levels during exposure to  $NH_4Cl$ . Detailed information (average, SEM, n and statistics) is available in in Table S1.

**Supplementary Table S1: Summary of the mean, SEM, n/N numbers and statistic reports of all measured variables in the study.** Independent field of view (n), independent animal (N), not applicable (empty cells).

| Figure | measured variable           | Group          | Mean $\pm$ SEM    | n/N  | statistics          | p-value  |
|--------|-----------------------------|----------------|-------------------|------|---------------------|----------|
| 1b     | Mander's coefficient        | VAMP2 in VPS35 | 0.22 $\pm$ 0.01   | 78/3 |                     |          |
|        |                             | VPS35 in VAMP2 | 0.35 $\pm$ 0.02   | 78/3 |                     |          |
| 2c     | Relative VPS35 levels (ICC) | Control        | 1 $\pm$ 0.049     | 40/3 | H = 126.5, p<0.0001 |          |
|        |                             | shVPS35-1      | 0.18 $\pm$ 0.01   | 40/3 |                     | <0.0001  |
|        |                             | shVPS35-2      | 0.68 $\pm$ 0.03   | 41/3 |                     | 0.0524   |
|        |                             | shVPS35-3      | 0.19 $\pm$ 0.01   | 42/3 |                     | <0.0001  |
| 2d     | Relative VPS35 levels (WB)  | Control        | 1 $\pm$ 0.14      | 7    | H = 16.1, p=0.0011  |          |
|        |                             | shVPS35-1      | 0.25 $\pm$ 0.04   | 7    |                     | 0.0053   |
|        |                             | shVPS35-2      | 0.58 $\pm$ 0.11   | 7    |                     | 0.4866   |
|        |                             | shVPS35-3      | 0.20 $\pm$ 0.06   | 5    |                     | 0.0014   |
| 2f     | Relative GluA1 levels (ICC) | Control        | 1 $\pm$ 0.34      | 35/3 | H = 33.06, p<0.0001 |          |
|        |                             | shVPS35-1      | 0.64 $\pm$ 0.15   | 35/3 |                     | < 0.0001 |
|        |                             | shVPS35-2      | 0.72 $\pm$ 0.31   | 36/3 |                     | 0.0029   |
|        |                             | shVPS35-3      | 0.58 $\pm$ 0.28   | 35/3 |                     | < 0.0001 |
| 3c     | Dendritic length ( $\mu$ m) | Control        | 2122 $\pm$ 120    | 56/5 | H = 7.61, p=0.0547  |          |
|        |                             | shVPS35-1      | 1750 $\pm$ 89     | 57/5 |                     |          |
|        |                             | shVPS35-2      | 1747 $\pm$ 92     | 64/5 |                     |          |
|        |                             | shVPS35-3      | 1775 $\pm$ 139    | 48/5 |                     |          |
| 3d     | Axonal length ( $\mu$ m)    | Control        | 2952 $\pm$ 328    | 26/3 | H = 0.23, p=0.9709  |          |
|        |                             | shVPS35-1      | 3142 $\pm$ 335    | 27/3 |                     |          |
|        |                             | shVPS35-2      | 3200 $\pm$ 330    | 33/3 |                     |          |
|        |                             | shVPS35-3      | 3022 $\pm$ 394    | 18/3 |                     |          |
| 3f     | Synapses/ $\mu$ m (VAMP2)   | Control        | 0.19 $\pm$ < 0.01 | 41/3 | H = 19.35, p=0.0002 |          |
|        |                             | shVPS35-1      | 0.20 $\pm$ 0.01   | 29/3 |                     | >0.9999  |
|        |                             | shVPS35-2      | 0.15 $\pm$ < 0.01 | 31/3 |                     | 0.0011   |
|        |                             | shVPS35-3      | 0.16 $\pm$ < 0.01 | 28/3 |                     | 0.0127   |
| 3g     | VAMP2 (a.u.)                | Control        | 74.06 $\pm$ 5.16  | 41/3 | H = 2.60, p=0.4562  |          |
|        |                             | shVPS35-1      | 77.09 $\pm$ 6.59  | 29/3 |                     |          |
|        |                             | shVPS35-2      | 69.47 $\pm$ 5.25  | 31/3 |                     |          |
|        |                             | shVPS35-3      | 80.64 $\pm$ 5.40  | 28/3 |                     |          |



| Figure | measured variable                     | Group     | Mean $\pm$ SEM    | n/N   | statistics                 | p-value  |
|--------|---------------------------------------|-----------|-------------------|-------|----------------------------|----------|
| 3h     | Synaptophysin-1 (a.u)                 | Control   | 82.58 $\pm$ 6.34  | 41/3  | H = 2.30, p=0.5113         |          |
|        |                                       | shVPS35-1 | 76.19 $\pm$ 8.24  | 29/3  |                            |          |
|        |                                       | shVPS35-2 | 77.97 $\pm$ 6.57  | 31/3  |                            |          |
|        |                                       | shVPS35-3 | 90.52 $\pm$ 6.63  | 28/3  |                            |          |
| 3i     | Synapses/ $\mu$ m (bassoon)           | Control   | 0.29 $\pm$ 0.01   | 18/2  | H = 8.02, p=0.0454         |          |
|        |                                       | shVPS35-1 | 0.25 $\pm$ 0.01   | 18/2  |                            |          |
|        |                                       | shVPS35-2 | 0.27 $\pm$ 0.01   | 19/2  |                            |          |
|        |                                       | shVPS35-3 | 0.29 $\pm$ 0.01   | 18/2  |                            |          |
| 4b     | Active zone length ( $\mu$ m)         | Control   | 0.54 $\pm$ 0.02   | 154/3 | H = 7.81, p=0.0501         |          |
|        |                                       | shVPS35-1 | 0.49 $\pm$ 0.02   | 161/3 |                            |          |
|        |                                       | shVPS35-2 | 0.48 $\pm$ 0.01   | 163/3 |                            |          |
|        |                                       | shVPS35-3 | 0.47 $\pm$ 0.01   | 160/3 |                            |          |
| 4c     | # Synaptic vesicles/synapse           | Control   | 90.14 $\pm$ 5.51  | 159/3 | H = 6.06, p=0.1085         |          |
|        |                                       | shVPS35-1 | 99.13 $\pm$ 7.03  | 164/3 |                            |          |
|        |                                       | shVPS35-2 | 88.10 $\pm$ 4.70  | 165/3 |                            |          |
|        |                                       | shVPS35-3 | 105.40 $\pm$ 6.02 | 162/3 |                            |          |
| 4d     | # docked synaptic vesicles/synapse    | Control   | 4.91 $\pm$ 0.22   | 159/3 | H = 0.03, p=9980           |          |
|        |                                       | shVPS35-1 | 4.95 $\pm$ 0.21   | 164/3 |                            |          |
|        |                                       | shVPS35-2 | 4.91 $\pm$ 0.20   | 165/3 |                            |          |
|        |                                       | shVPS35-3 | 4.76 $\pm$ 0.17   | 162/3 |                            |          |
| 5c     | 1st peak amplitude ( $\Delta$ F/Fmax) | Control   | 0.14 $\pm$ < 0.01 | 31/4  | H = 6.74, p = 0.0343       |          |
|        |                                       | shVPS35-2 | 0.19 $\pm$ 0.01   | 19/4  |                            | 0.0211   |
|        |                                       | shVPS35-3 | 0.16 $\pm$ 0.01   | 14/4  |                            | > 0.9999 |
| 5d     | % Active synapses                     | Control   | 93.89 $\pm$ 1.09  | 31/4  | H = 0.05, p = 0.9751       |          |
|        |                                       | shVPS35-2 | 91.11 $\pm$ 2.55  | 19/4  |                            |          |
|        |                                       | shVPS35-3 | 91.77 $\pm$ 2.52  | 14/4  |                            |          |
| 5e     | Fmax (a.u.)                           | Control   | 1584 $\pm$ 28     | 31/4  | H = 13.33, p = 0.0013      |          |
|        |                                       | shVPS35-2 | 1442 $\pm$ 28     | 19/4  |                            | 0.0014   |
|        |                                       | shVPS35-3 | 1469 $\pm$ 29     | 14/4  |                            | 0.0277   |
| 6c     | 1st peak amplitude ( $\Delta$ F/Fmax) | Control   | 0.15 $\pm$ < 0.01 | 26/3  | F(3,92) = 1.5227, p=0.2127 |          |
|        |                                       | shVPS35-1 | 0.13 $\pm$ < 0.01 | 22/3  |                            |          |
|        |                                       | shVPS35-2 | 0.13 $\pm$ < 0.01 | 23/3  |                            |          |
|        |                                       | shVPS35-3 | 0.13 $\pm$ < 0.01 | 25/3  |                            |          |
| 6d     | % Active synapses                     | Control   | 89.03 $\pm$ 2.08  | 26/3  | H = 13.32, p=0.0040        |          |
|        |                                       | shVPS35-1 | 70.50 $\pm$ 4.58  | 22/3  |                            | 0.0012   |
|        |                                       | shVPS35-2 | 81.71 $\pm$ 3.62  | 23/3  |                            | 0.3297   |
|        |                                       | shVPS35-3 | 87.11 $\pm$ 1.80  | 25/3  |                            | > 0.9999 |

| Figure | measured variable                         | Group                        | Mean $\pm$ SEM    | n/N  | statistics                                                                     | p-value  |
|--------|-------------------------------------------|------------------------------|-------------------|------|--------------------------------------------------------------------------------|----------|
| 6e     | Fmax (a.u.)                               | Control                      | 5726 $\pm$ 487    | 26/3 | H = 14.25, p=0.0026                                                            |          |
|        |                                           | shVPS35-1                    | 3711 $\pm$ 239    | 22/3 |                                                                                | 0.0034   |
|        |                                           | shVPS35-2                    | 4206 $\pm$ 258    | 23/3 |                                                                                | 0.1957   |
|        |                                           | shVPS35-3                    | 5490 $\pm$ 491    | 25/3 |                                                                                | > 0.9999 |
| 6f     | F Baseline (a.u.)                         | Control                      | 2841 $\pm$ 117    | 26/3 | H = 8.81, p=0.0318                                                             |          |
|        |                                           | shVPS35-1                    | 2251 $\pm$ 132    | 22/3 |                                                                                | 0.0226   |
|        |                                           | shVPS35-2                    | 2355 $\pm$ 66     | 23/3 |                                                                                | 0.4927   |
|        |                                           | shVPS35-3                    | 2863 $\pm$ 198    | 25/3 |                                                                                | > 0.9999 |
| 6g     | Ratio peak amplitude (2nd/1st)            | Control                      | 1.21 $\pm$ 0.03   | 26/3 | H = 2.26, p=0.4532                                                             |          |
|        |                                           | shVPS35-1                    | 1.08 $\pm$ 0.05   | 22/3 |                                                                                |          |
|        |                                           | shVPS35-2                    | 1.21 $\pm$ 0.03   | 23/3 |                                                                                |          |
|        |                                           | shVPS35-3                    | 1.15 $\pm$ 0.04   | 25/3 |                                                                                |          |
| 6h     | F pH = 5.5 (a.u.)                         | Control                      | 1881 $\pm$ 214    | 26/3 | H = 6.56, p=0.0870                                                             |          |
|        |                                           | shVPS35-1                    | 1621 $\pm$ 150    | 22/3 |                                                                                |          |
|        |                                           | shVPS35-2                    | 1883 $\pm$ 173    | 23/3 |                                                                                |          |
|        |                                           | shVPS35-3                    | 1787 $\pm$ 120    | 25/3 |                                                                                |          |
| S4b    | Dendritic length (mm)                     | DIV4                         | 0.40 $\pm$ 0.05   | 20/2 | U = 36.00, p<0.0001                                                            |          |
|        |                                           | DIV14                        | 1.55 $\pm$ 0.22   | 20/2 |                                                                                |          |
| S4c    | Axonal length (mm)                        | DIV4                         | 0.66 0 $\pm$ 0.12 | 20/2 | U = 85.00, p=0.0082                                                            |          |
|        |                                           | DIV14                        | 1.27 $\pm$ 0.18   | 20/2 |                                                                                |          |
| S5b    | 1st peak amplitude ( $\Delta F/F_{max}$ ) | Control                      | 0.06 $\pm$ <0.01  | 21/2 | H = 46.45, p<0.0001<br>(shVPS35-3 vs<br>shVPS35-3 without<br>calcium p<0.0001) |          |
|        |                                           | Control without<br>calcium   | 0.02 $\pm$ < 0.01 | 20/2 |                                                                                | <0.0001  |
|        |                                           | shVPS35-3                    | 0.06 $\pm$ <0.01  | 24/2 |                                                                                | > 0.9999 |
|        |                                           | shVPS35-3<br>without calcium | 0.02 $\pm$ <0.01  | 18/2 |                                                                                |          |
| S5b    | Fmax ( $\Delta F/F_0$ )                   | Control                      | 1.04 $\pm$ 0.15   | 21/2 | H = 0.89, p=0.8256                                                             |          |
|        |                                           | Control without<br>calcium   | 0.83 $\pm$ 0.08   | 20/2 |                                                                                |          |
|        |                                           | shVPS35-3                    | 0.99 $\pm$ 0.12   | 24/2 |                                                                                |          |
|        |                                           | shVPS35-3<br>without calcium | 0.92 $\pm$ 0.12   | 18/2 |                                                                                |          |
